# Supplementary material
Source: PubMed Central journal article supplement (PMC4895688)
Supplement: JVIM-29-1667-s001.pdf [file JVIM-29-1667-s001.pdf]

| <b>Foal</b> | <b>Age (days)</b> | <b>Mentation</b> | <b>Menace response</b> | <b>Cutaneous trunci reflex</b> | <b>GP ataxia (thoracic limbs)</b> | <b>GP ataxia (pelvic limbs)</b> |
|-------------|-------------------|------------------|------------------------|--------------------------------|-----------------------------------|---------------------------------|
| NAD/EDM1    | 4                 | N                | N/A                    | N                              | 0                                 | 0                               |
|             | 10                | N                | N/A                    | N                              | 0                                 | 0                               |
|             | 30                | N                | N/A                    | N                              | 0                                 | 0                               |
|             | 60                | N                | N                      | N                              | 0                                 | 0                               |
|             | 90                | N                | N                      | N                              | 0                                 | 0                               |
|             | 120               | N                | N                      | N                              | 2                                 | 2                               |
|             | 150               | IO               | N                      | N                              | 2.5                               | 2.5                             |
|             | 180               | IO               | Absent OU              | N                              | 2.5                               | 2.5                             |
|             | 210               | IO               | Absent OU              | N                              | 2.5                               | 2.5                             |
|             | 240               | IO               | Absent OU              | N                              | 2.5                               | 2.5                             |
|             | 300               | IO               | Absent OU              | N                              | 2.5                               | 2.5                             |
|             | 360               | IO               | Absent OU              | N                              | 2                                 | 2                               |
|             | 540               | IO               | Absent OU              | N                              | 2.5                               | 2.5                             |
| NAD/EDM2    | 4                 | N                | N/A                    | N                              | 0                                 | 0                               |
|             | 10                | N                | N/A                    | N                              | 0                                 | 0                               |
|             | 30                | N                | N/A                    | N                              | 0                                 | 0                               |
|             | 60                | N                | N                      | N                              | 0.5                               | 0                               |
|             | 90                | N                | N                      | N                              | 0                                 | 0                               |
|             | 120               | IO               | N                      | N                              | 0                                 | 1                               |
|             | 150               | IO               | N                      | N                              | 2                                 | 2                               |
|             | 180               | IO               | N                      | N                              | 2.5                               | 2.5                             |
|             | 210               | IO               | N                      | N                              | 2.5                               | 2.5                             |
|             | 240               | IO               | N                      | N                              | 2.5                               | 2.5                             |
|             | 300               | IO               | N                      | N                              | 2.5                               | 2.5                             |
|             | 360               | IO               | N                      | N                              | 2                                 | 2                               |
|             | 540               | IO               | N                      | N                              | 2.5                               | 2.5                             |
| NAD/EDM3    | 4                 | N                | N/A                    | N                              | 0                                 | 0                               |
|             | 10                | N                | N/A                    | N                              | 0                                 | 0                               |
|             | 30                | N                | N/A                    | N                              | 1                                 | 1                               |

|          |     |    |                 |   |   |   |
|----------|-----|----|-----------------|---|---|---|
|          | 60  | N  | Inconsistent OU | N | 1 | 1 |
|          | 90  | N  | Inconsistent OU | N | 1 | 1 |
|          | 120 | N  | Inconsistent OU | N | 1 | 1 |
|          | 150 | N  | Inconsistent OU | N | 1 | 1 |
|          | 180 | N  | Inconsistent OU | N | 2 | 2 |
|          | 210 | N  | Inconsistent OU | N | 2 | 2 |
|          | 240 | N  | Inconsistent OU | N | 2 | 2 |
|          | 300 | N  | Inconsistent OU | N | 2 | 2 |
|          | 360 | N  | Inconsistent OU | N | 2 | 2 |
|          | 540 | N  | Inconsistent OU | N | 2 | 2 |
| NAD/EDM4 | 4   | N  | N/A             | N | 0 | 0 |
|          | 10  | N  | N/A             | N | 1 | 1 |
|          | 30  | N  | N/A             | N | 1 | 1 |
|          | 60  | IO | Inconsistent OU | N | 1 | 1 |
|          | 90  | IO | Inconsistent OU | N | 1 | 1 |
|          | 120 | IO | Inconsistent OU | N | 1 | 1 |
|          | 150 | IO | Inconsistent OU | N | 1 | 1 |
|          | 180 | IO | Inconsistent OU | N | 2 | 2 |
|          | 210 | IO | Inconsistent OU | N | 2 | 2 |
|          | 240 | IO | Inconsistent OU | N | 2 | 2 |
|          | 300 | IO | Inconsistent OU | N | 2 | 2 |
|          | 360 | IO | Inconsistent OU | N | 2 | 2 |
|          | 540 | IO | Inconsistent OU | N | 2 | 2 |

**Supplementary Table 1:** Neurologic examination results from the 4 NAD/EDM-affected foals throughout the first 1.5 years of life.

GP=general proprioceptive, NAD/EDM=Neuroaxonal dystrophy/ equine degenerative myelencephalopathy, N=normal, N/A=not assessed, IO=intermittent obtundation, OU=both left and right eyes.
