# Supplementary material
Source: PubMed Central journal article supplement (PMC4895688)
Supplement: JVIM-29-1667-s002.pdf [file JVIM-29-1667-s002.pdf]

| Foal     | Alpha-tocopherol concentration |                             |                              |                             |                              |                             |
|----------|--------------------------------|-----------------------------|------------------------------|-----------------------------|------------------------------|-----------------------------|
|          | 1 year of age                  |                             | 15-days post supplementation |                             | 30-days post supplementation |                             |
|          | Serum<br>(µg/mL)               | CSF<br>(µg/mL) <sup>#</sup> | Serum<br>(µg/mL)             | CSF<br>(µg/mL) <sup>#</sup> | Serum<br>(µg/mL)             | CSF<br>(µg/mL) <sup>#</sup> |
| CON-SUP1 | 0.86                           | <0.007                      | 2.7                          | 0.012                       | 1.9                          | 0.013                       |
| CON-SUP2 | 0.52                           | 0.008                       | 1.8                          | 0.013                       | 1.2                          | 0.015                       |
| NAD/EDM1 | 0.55                           | <0.007                      | 1.6                          | 0.01                        | 2.7                          | 0.012                       |
| NAD/EDM2 | 0.64                           | <0.007                      | 2                            | 0.008                       | 2.6                          | 0.011                       |

**Supplementary Table 2:** Serum and cerebrospinal fluid  $\alpha$ -tocopherol concentrations in 2 CON-SUP and 2 NAD/EDM foals at 360 days of age and following 30 days of supplementation with RRR- $\alpha$ -tocopherol at 0.67 IU/kg by mouth once a day. <sup>#</sup>Limit of detection is 0.007 µg/mL. CSF=cerebrospinal fluid.
